# Supplementary material for: Kinetics of albumin microbubble dissolution in aqueous media
Source: Royal Society of Chemistry journal article supplement (doi:10.1039/c9sm01516g), 2020-01-01
Supplement: c9sm01516g1.pdf [file c9sm01516g1.pdf]

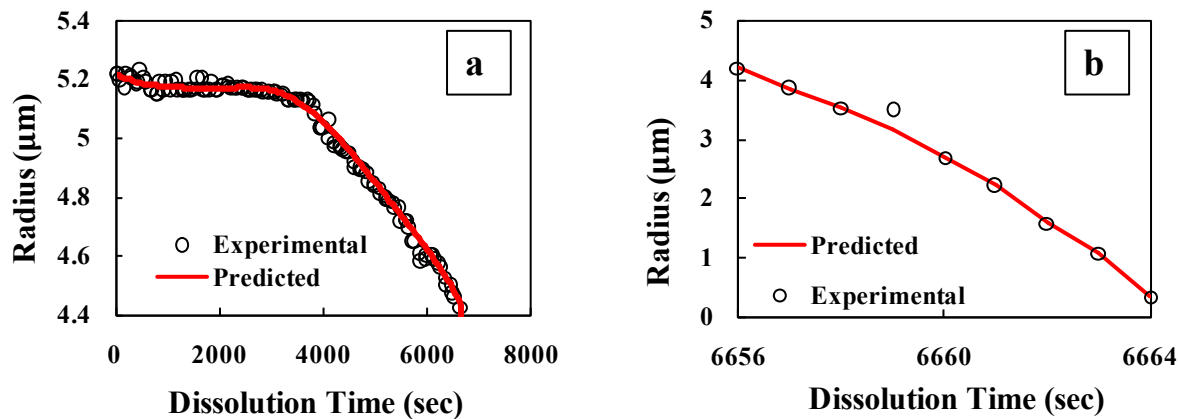

Figure S1 : Comparison between experimental and predicted radius v/s time for dissolution of 5.2  $\mu\text{m}$  (radius) air microbubble dissolving in an air saturated medium (a) Phase 1, (b) Phase 2

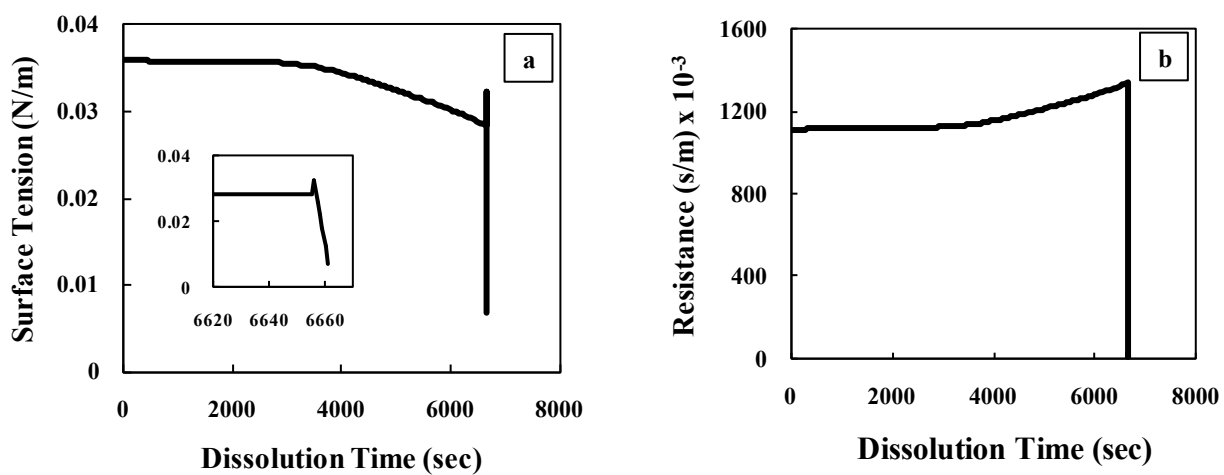

Figure S2 : Change in surface tension and shell resistance for air microbubbles dissolving in air saturated medium for complete dissolution\

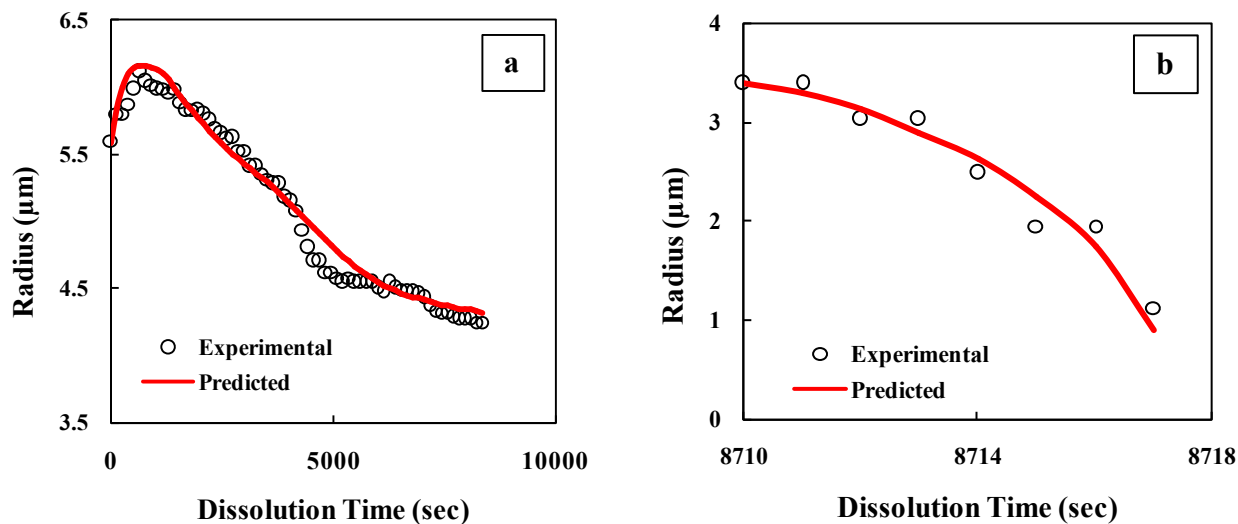

Figure S3: Comparison between predicted and experimental radius v/s time for SF6 microbubbles dissolving in air saturated environment. (a) Phase 1 and (b) Phase 2

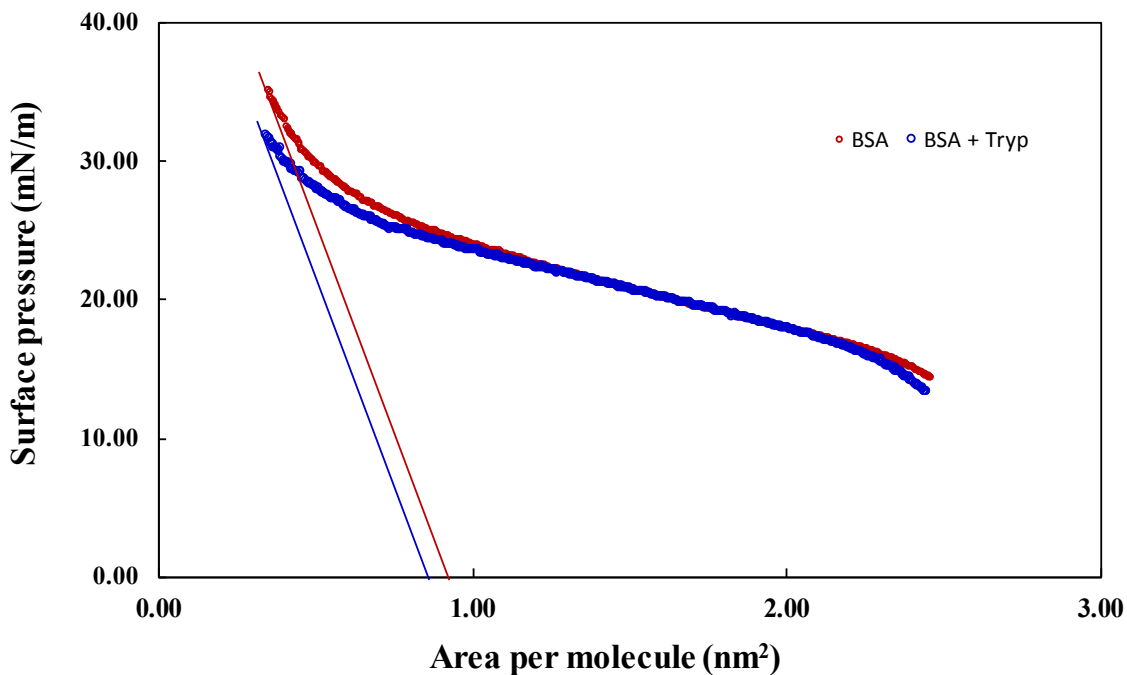

Figure S4: Pressure-area isotherm for a monolayer of BSA (3wt%) + 4mM Trypan 3wt% BSA alone formed at an air water interface
